# Supplementary material for: Microplastics in eviscerated flesh and excised organs of dried fish
Source: PubMed Central journal article supplement (PMC5511207; doi:10.1038/s41598-017-05828-6), 2017-07-14

# Supplementary Information

1

2

## 3 **Microplastics in eviscerated flesh and excised organs of dried fish**

4 Ali Karami<sup>\*,1</sup>, Abolfazl Golieskardi<sup>1</sup>, Yu Bin Ho<sup>1</sup>, Vincent Larat<sup>3</sup>, Babak Salamatina<sup>2</sup>

5

6

7

8

9

10

11

12

13

14

15

16

17 Figure 1. **Field emission scanning electron microscopy (FESEM) image and energy-dispersive**  
18 **X-ray (EDX) spectra of some of the extracted microplastics.** Field emission scanning electron  
19 microscopy image of one a) polyethylene, b) polystyrene, and c) polypropylene particle. Energy-  
20 dispersive X-ray spectra show d) and e) carbon (C) and oxygen (O) content, and f) C, O, nitrogen  
21 (N), sodium (Na), and chlorine (Cl) contents.

22

23 d)

24

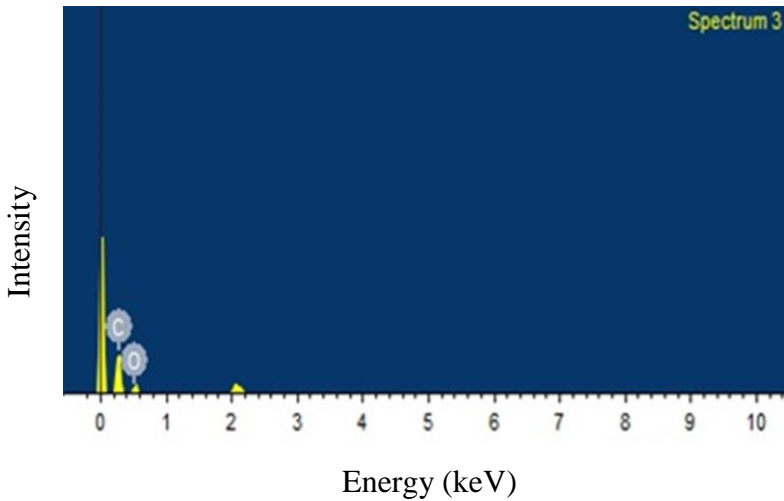

32

33

34 e)

35

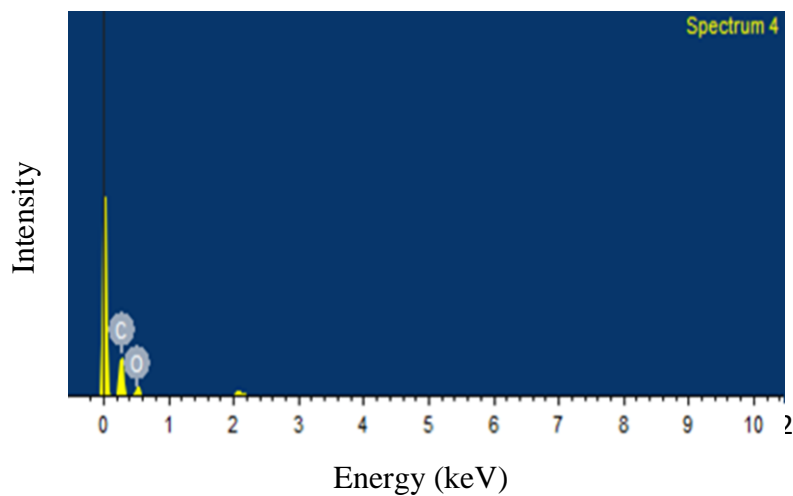

a)

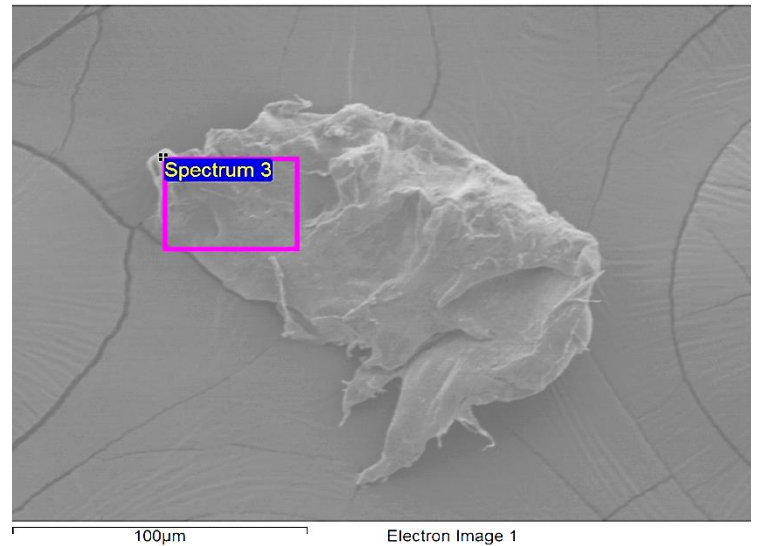

b)

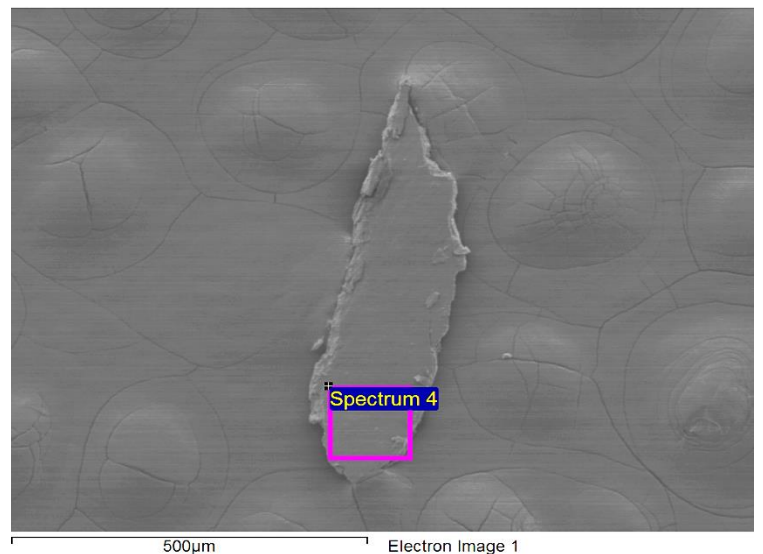

41 f)

42

43

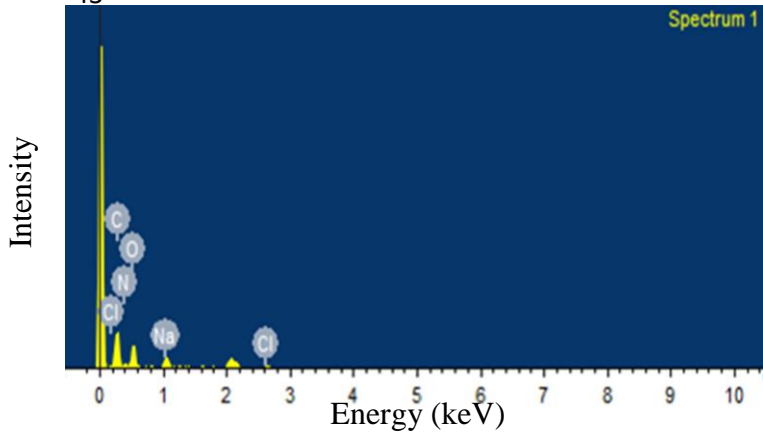

50

51

52

53

54

55

56

57

c)

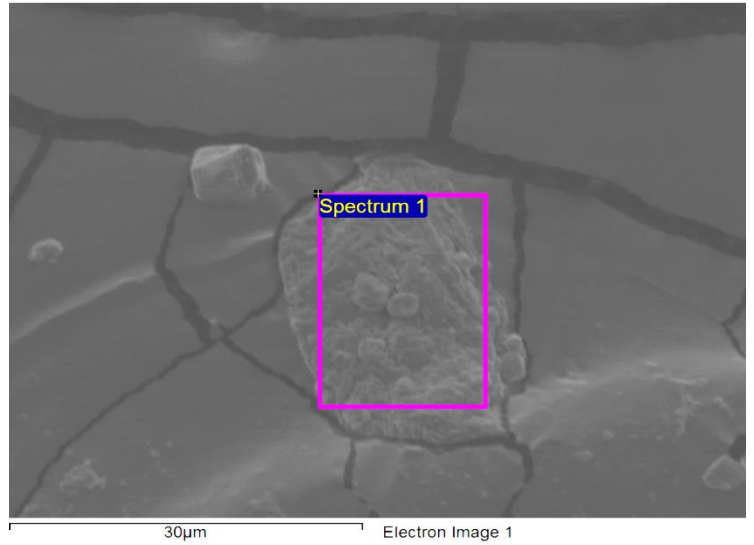

Supplement: 41598_2017_5828_MOESM1_ESM.pdf [file 41598_2017_5828_MOESM1_ESM.pdf]
